# Supplementary material for: Modifying a D–A–π–A–D HTM system for higher hole mobility by themeta-substitution strategy to weaken the electron-donating ability of the donor unit: a DFT study
Source: Royal Society of Chemistry journal article supplement (doi:10.1039/d3nr01390a), 2023-01-01
Supplement: d3nr01390a1.pdf [file d3nr01390a1.pdf]

1 **Modifying D-A- $\pi$ -A-D HTM system for higher hole mobility by the**  
2 ***meta*-substitution strategy to weaken the electron-donating ability of**  
3 **donor unit: A DFT study**

4

5 Ke-Li Wang<sup>1,§</sup>, Qun-Gui Wang<sup>1,§</sup>, Cui-E Hu<sup>2,\*</sup>, Yan Cheng<sup>1,\*</sup>, Guang-Fu Ji<sup>3</sup>, Xiang-  
6 Rong Chen<sup>1</sup>

7

8 <sup>1</sup> College of Physics, Sichuan University, Chengdu 610064, China;

9 <sup>2</sup> College of Physics and Electronic Engineering, Chongqing Normal University,  
10 Chongqing 400047, China;

11 <sup>3</sup> National Key Laboratory for Shock Wave and Detonation Physics Research,  
12 Institute of Fluid Physics, CAEP, Mianyang 621900, China

13

14 **Abstract**

15 Tuning the electron-donating ability (EDA) of donor unit of hole transporting  
16 materials (HTMs) is an efficient strategy to modulate the optoelectronic properties of  
17 HTMs. Based on the strategy, we first theoretically investigated the effects of the EDA  
18 of donor unit on the D-A- $\pi$ -A-D architectural HTMs. Results show that the enhanced  
19 EDA of donor unit leads to larger hole reorganization energy and poorer molecular  
20 stability of HTM. In contrast, meta-substitution of side-group is an effective strategy to  
21 reduce the EDA of donor unit. We found that the application of the meta-substitution  
22 strategy in the D-A- $\pi$ -A-D system not only successfully improves the molecular  
23 stability, but also achieves higher hole mobilities by promoting the electronic coupling

---

\* Corresponding authors. E-mail: [cuiehu@cqnu.edu.cn](mailto:cuiehu@cqnu.edu.cn); [ycheng@scu.edu.cn](mailto:ycheng@scu.edu.cn)

1 between the molecular dimers and decreasing the hole reorganization energies  
2 simultaneously. Interfacial properties studies indicate the intermolecular coupling also  
3 synergistically enhances the interfacial charge extraction performance and reduces the  
4 carrier recombination. In conclusion, by utilizing the meta-substitution strategy to  
5 reduce the EDA of donor units on D-A- $\pi$ -A-D architectural HTMs, we successfully  
6 designed four superior performance HTMs mD1, mD2, mD3, and mD4.

7

8 **Keywords:** Hole transport materials; Perovskite solar cells; Electron-donating ability;  
9 *Meta*-substitution; Hole mobility; Interfacial properties.

10

11

12

13

14

15

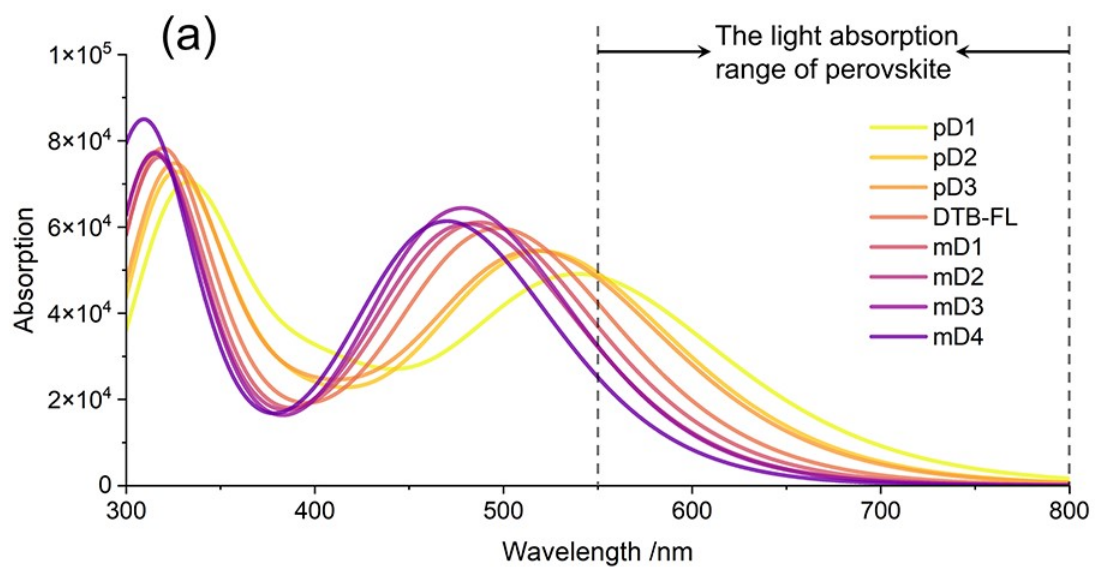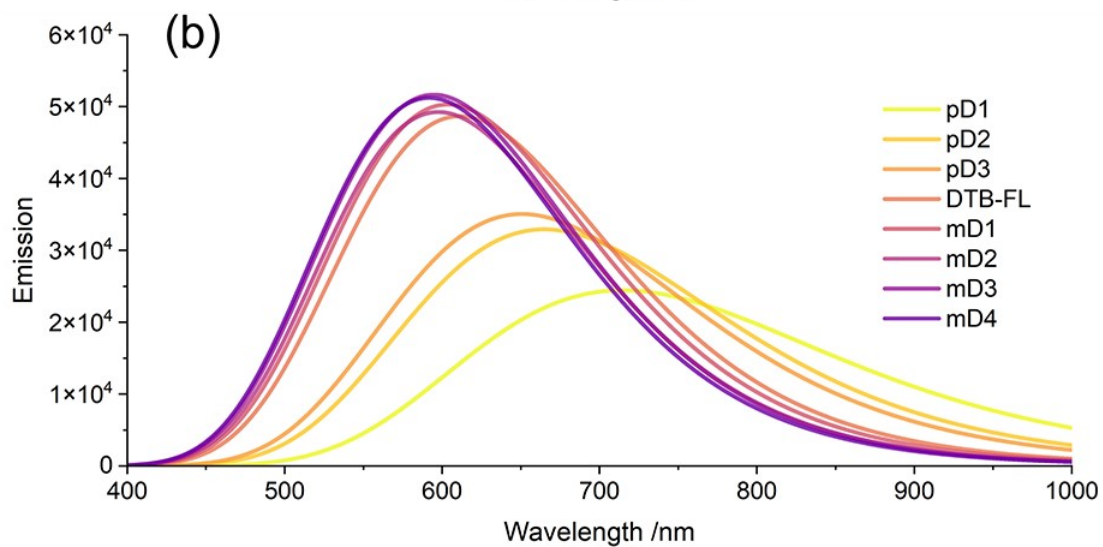

1

2

3 **Fig. S1.** (Color online) The calculated absorption and emission spectra of eight

4 investigated molecules at the TD-DFT/PBE38/6-31G (d, p) level in dichloromethane.

5

6

1

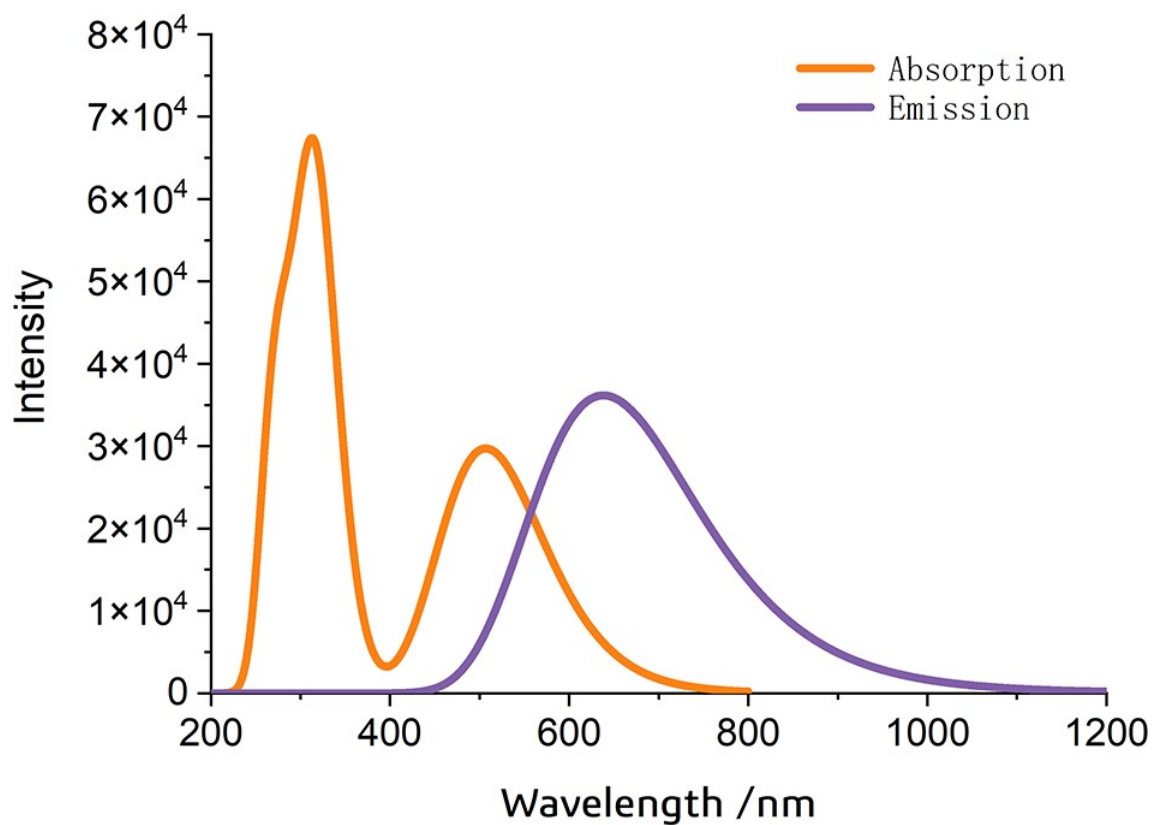

2

3

4 **Fig. S2.** (Color online) The calculated absorption and emission spectra of DT-BT

5 molecule at the TD-DFT/PBE38/6-31G (d, p) level in dichloromethane.

6

7

1

(a)

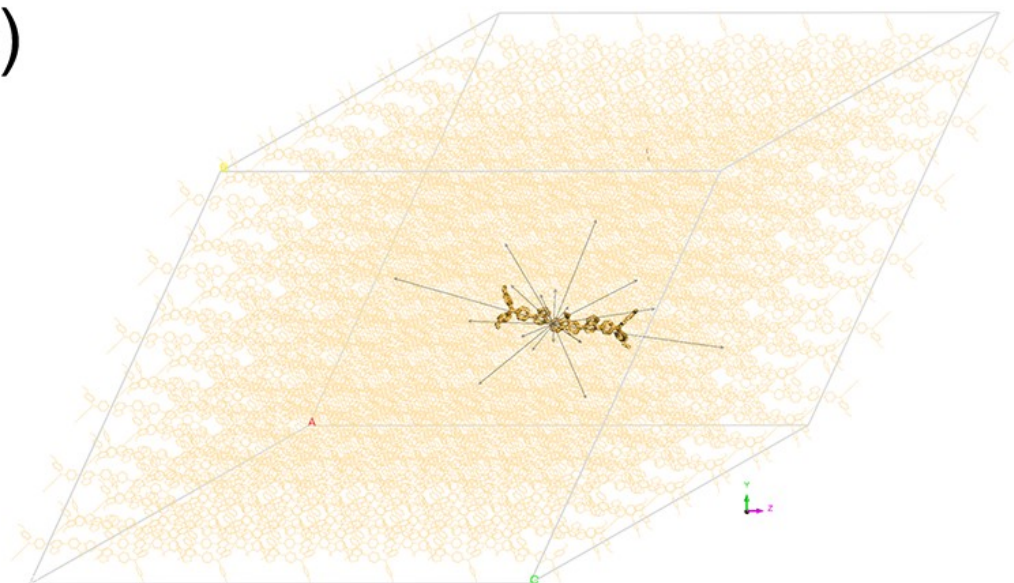

(b)

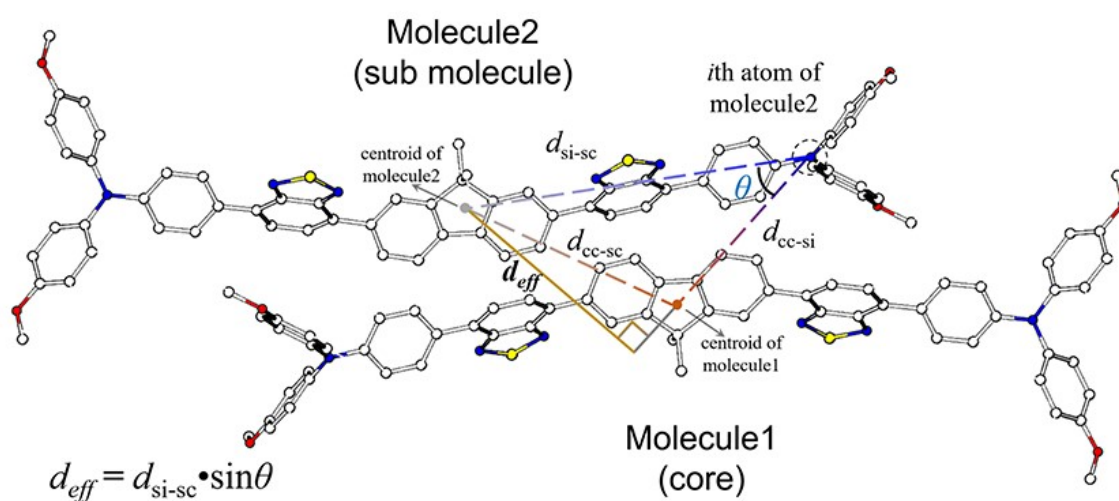

2

3 **Fig. S3.** (Color online) (a). The diagram of giant ideal crystal expanded by the lowest4 total energy crystal structure; (b). The illustration of the effective distance  $d_{eff}$  between

5 molecules of the dimer.

6

7

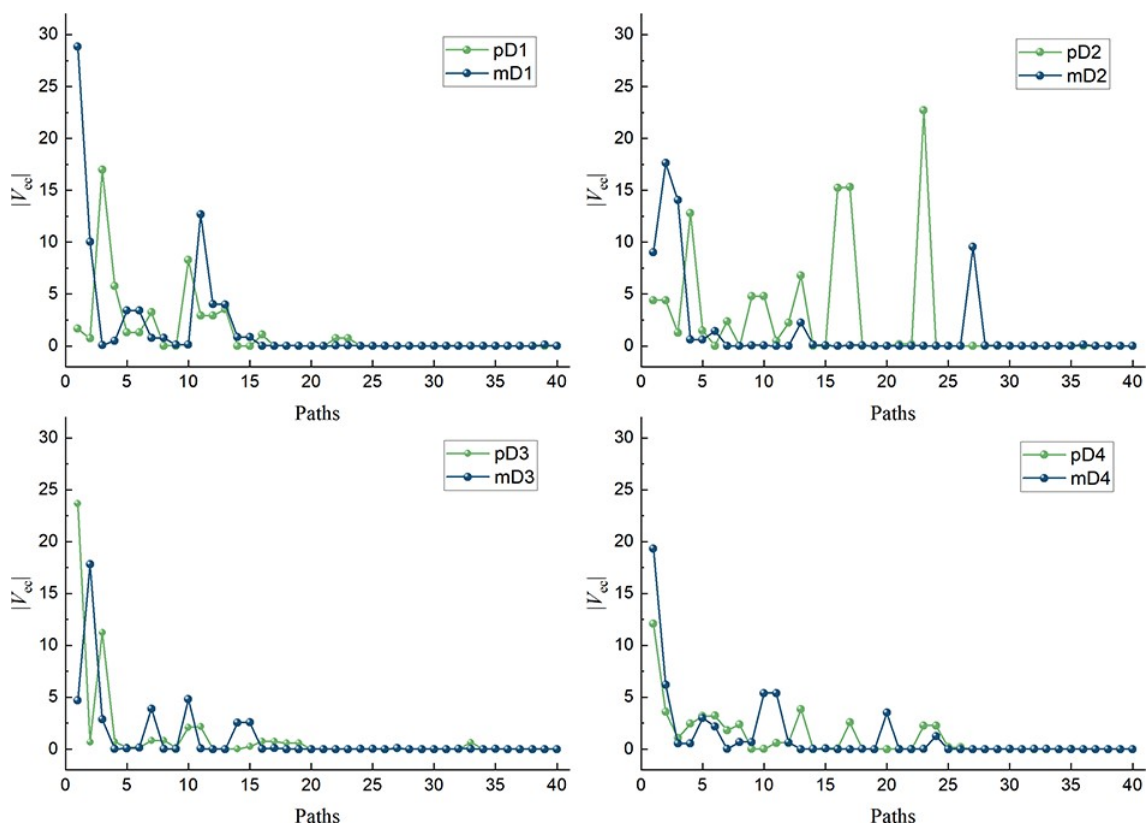

1

2

3 **Fig. S4.** (Color online) The convergence of electronic coupling of investigated

4 molecules.

5

1

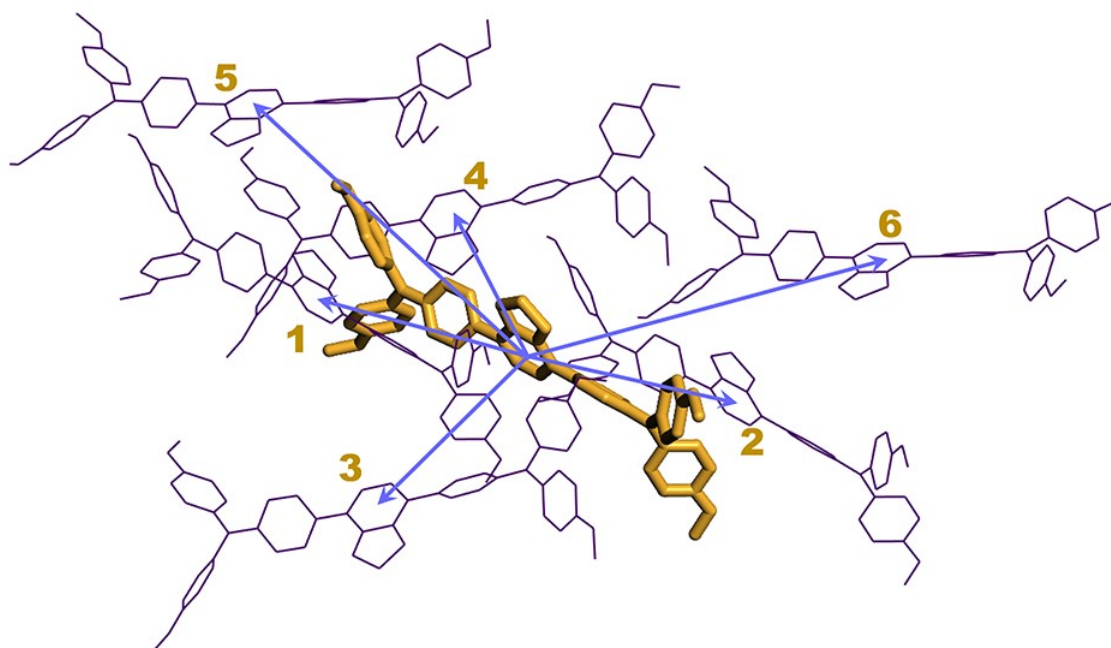

2

3

4 **Fig. S5.** (Color online) The crystal structure, hopping pathways, and the  
5 corresponding hole hopping rate on each main hopping pathway of DT-BT molecules.

6

7

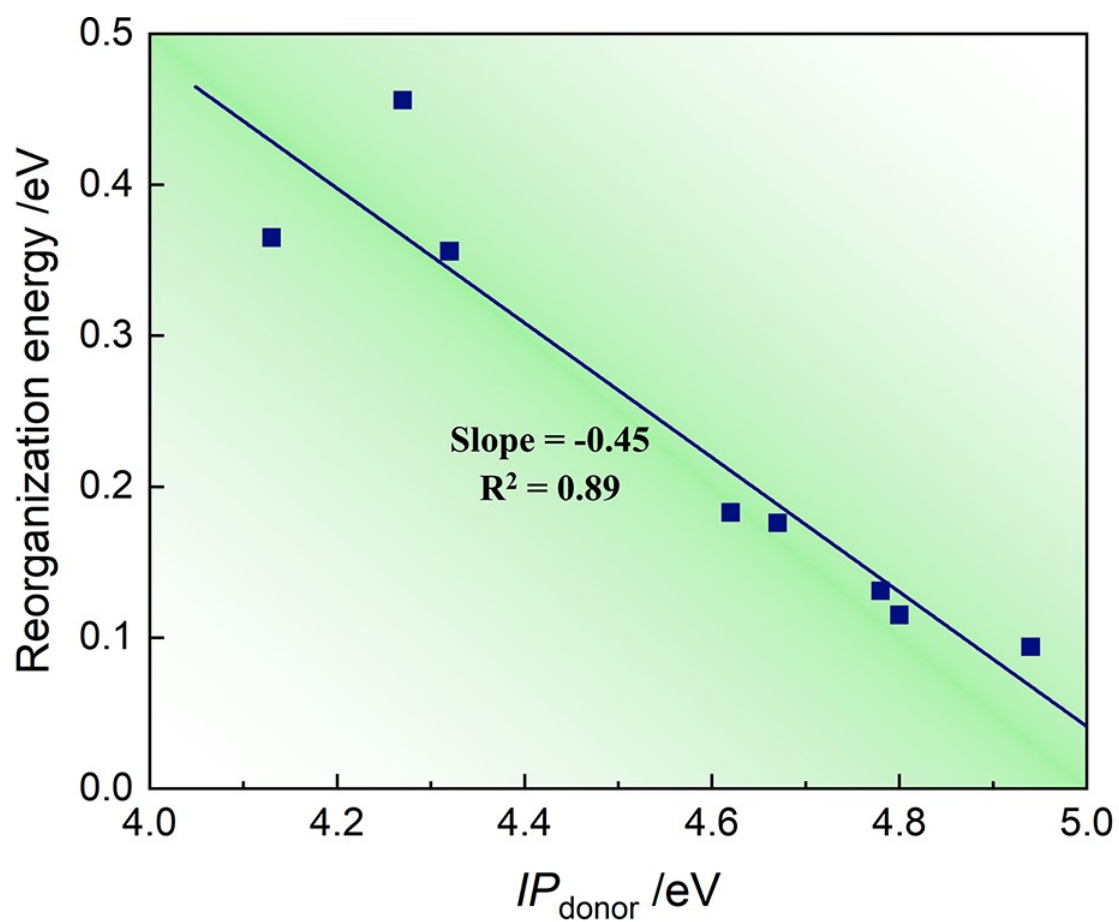

1

2

3 **Fig. S6.** (Color online) The linear regression fitting of reorganization energy as a

4 function of  $IP_{\text{donor}}$ .

5

6



**pD1**

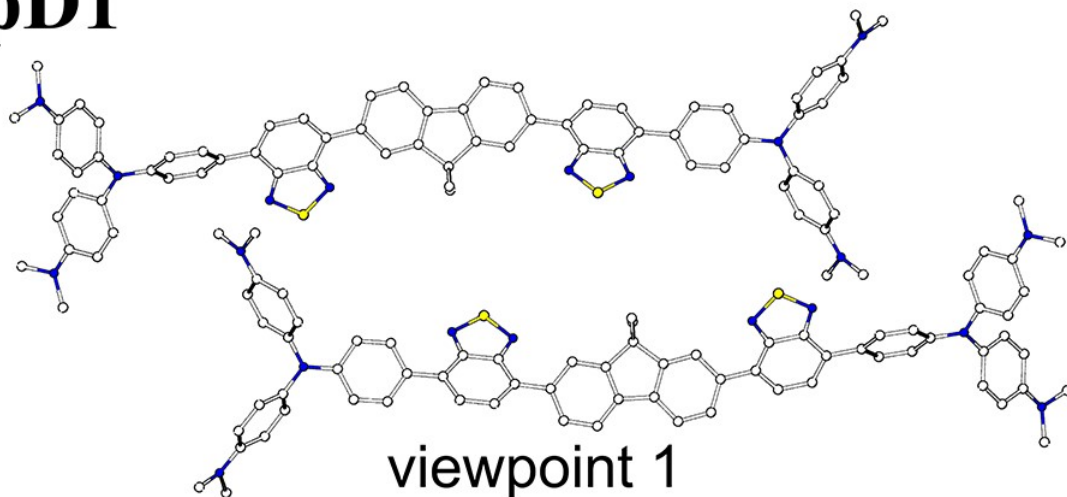

**overlapping orbitals**

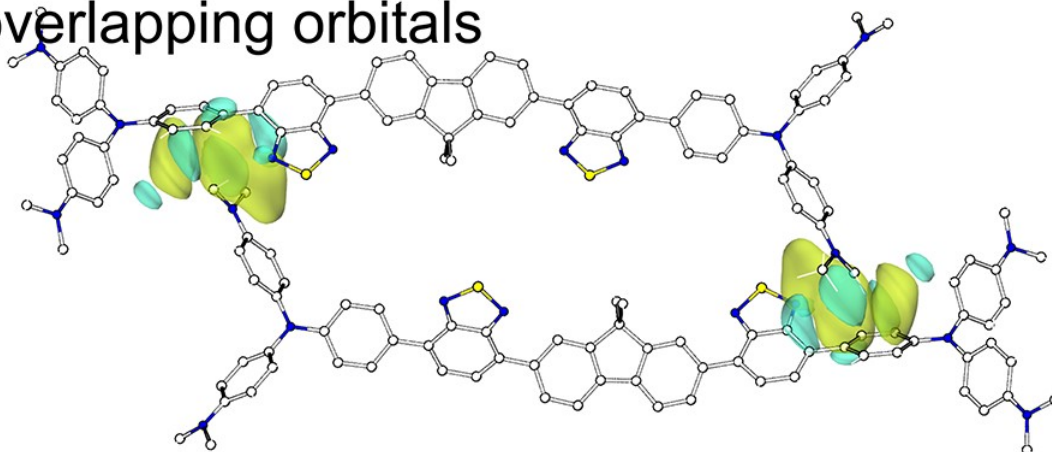

1

2

3 **Fig. S7.** (Color online) Viewpoint of interacting molecules in the dimer of the

4 predominate hopping path and the overlap between the orbitals of pD1.

5

6

# pD2

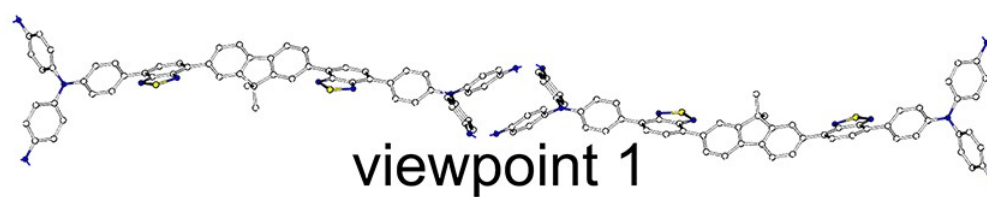

## overlapping orbitals

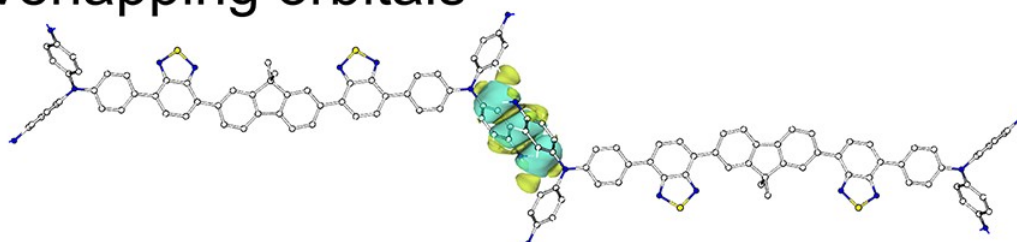

1

2

3 **Fig. S8.** (Color online) Viewpoint of interacting molecules in the dimer of the

4 predominate hopping path and the overlap between the orbitals of pD2.

5

6

**pD3**

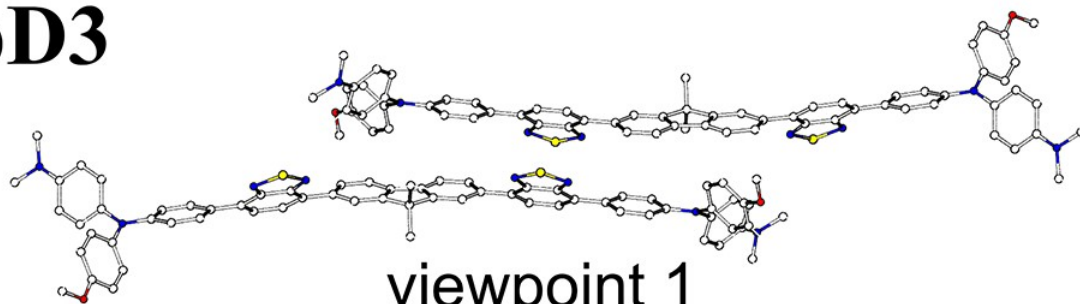

viewpoint 2

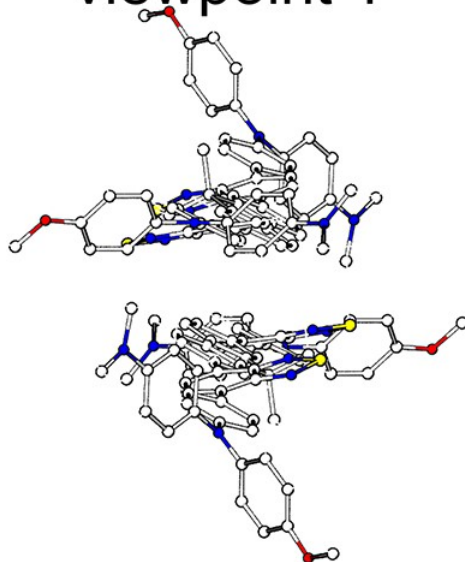

overlapping orbitals

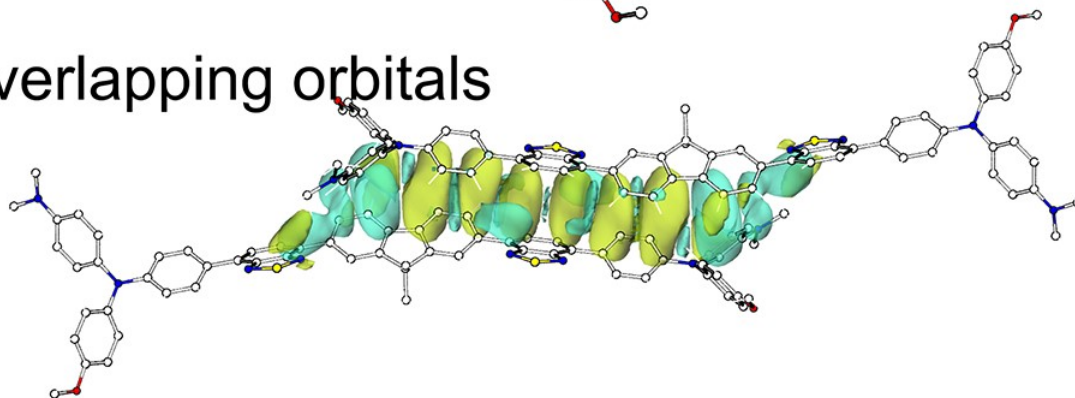

1

2

3 **Fig. S9.** (Color online) Viewpoints of interacting molecules in the dimer of the

4 predominate hopping path and the overlap between the orbitals of pD3.

5

6

# DTB-FL

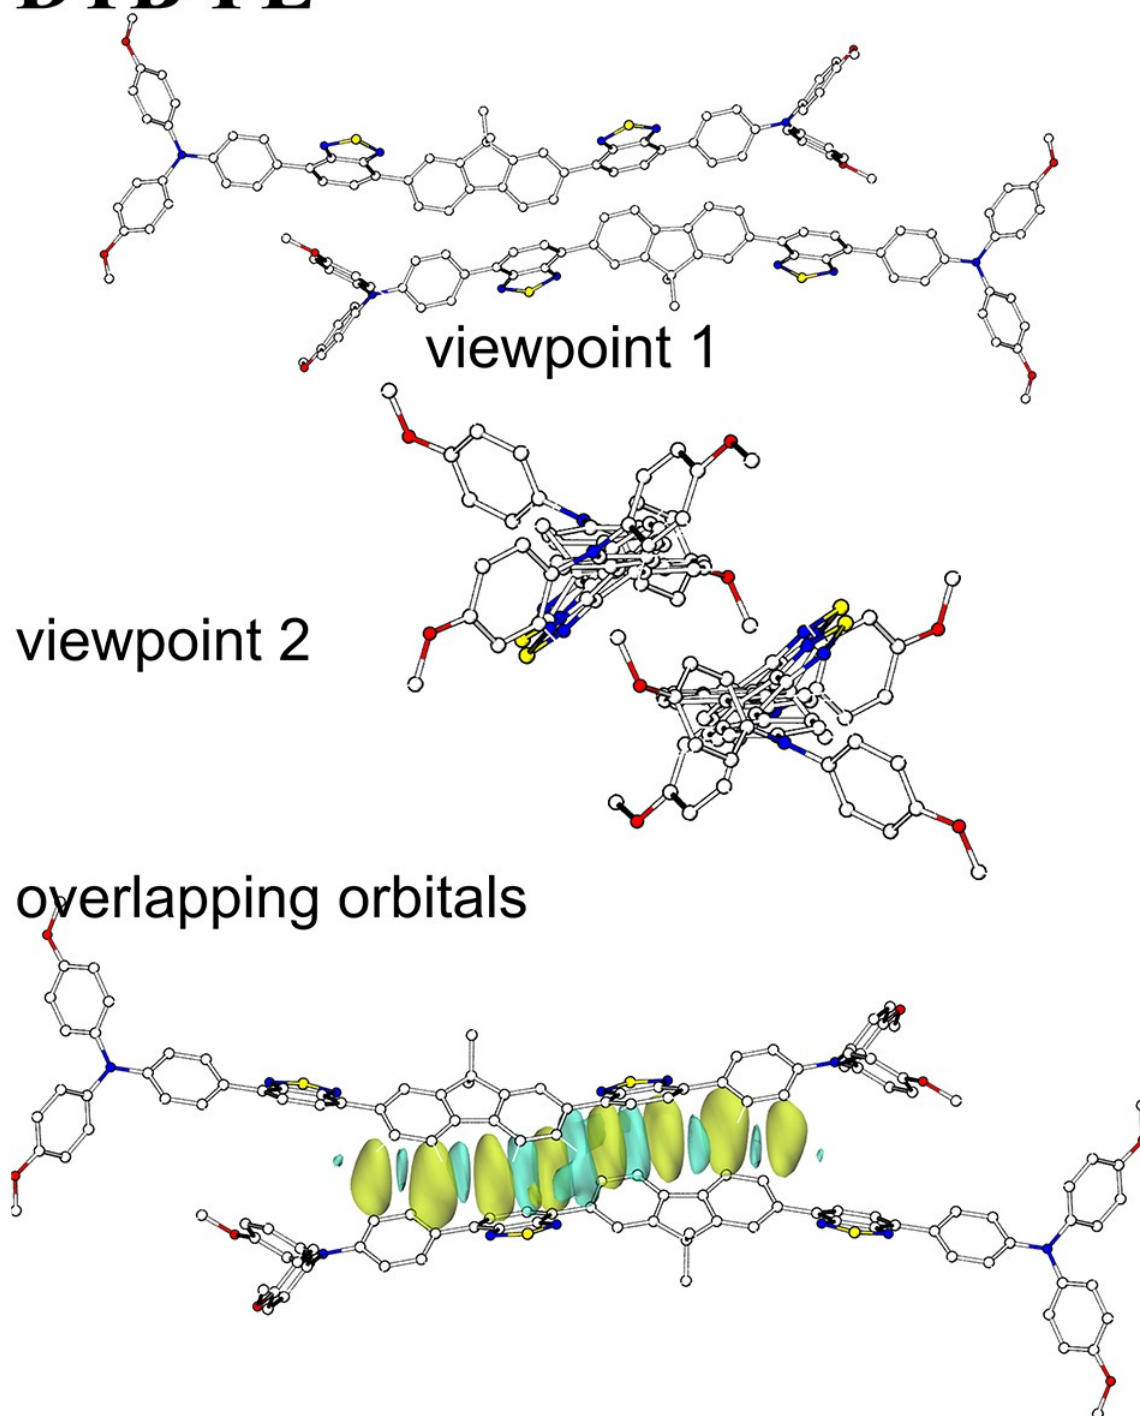

1

2

3 **Fig. S10.** (Color online) Viewpoints of interacting molecules in the dimer of the

4 predominate hopping path and the overlap between the orbitals of DTB-FL.

5

**mD1**

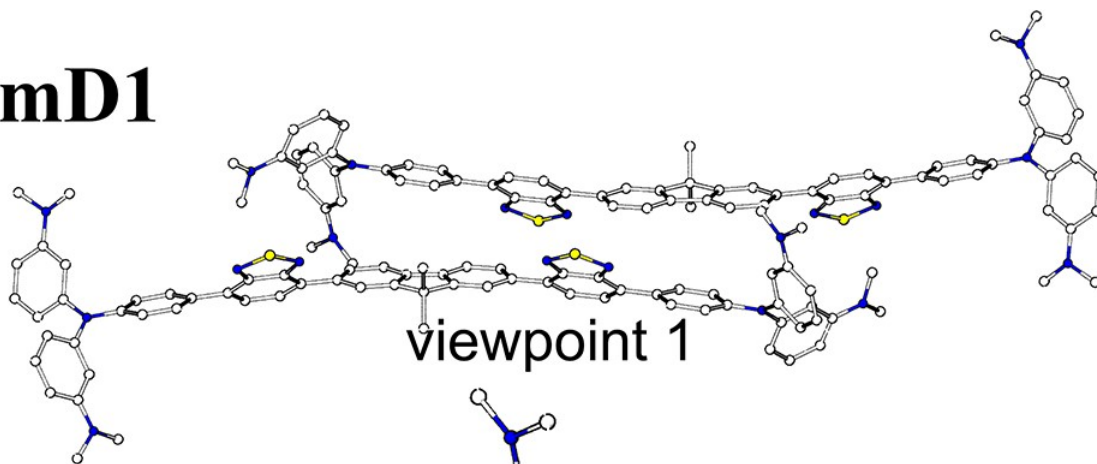

viewpoint 2

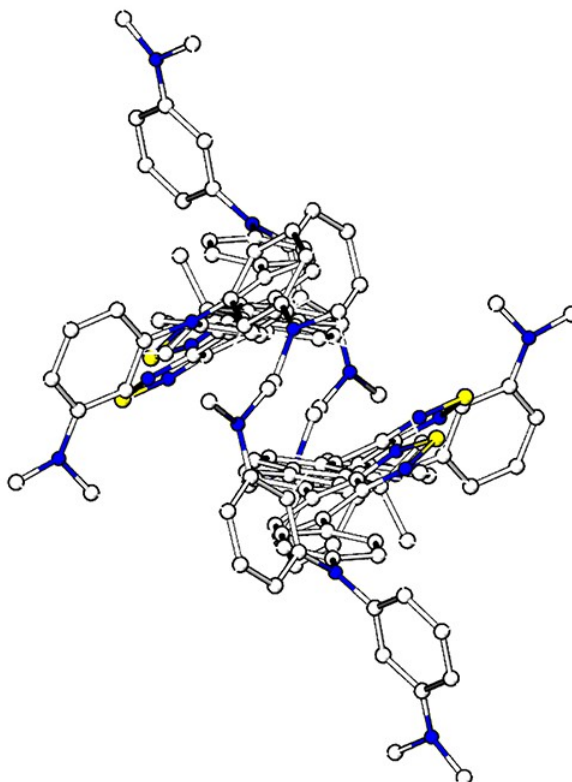

overlapping orbitals

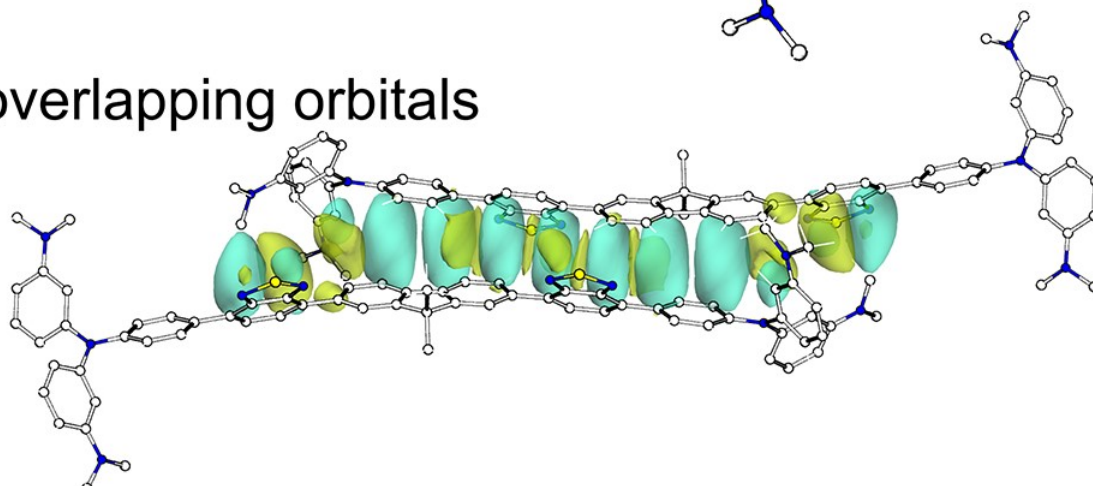

1

2 **Fig. S11.** (Color online) Viewpoints of interacting molecules in the dimer of the

3 predominate hopping path and the overlap between the orbitals of mD1.

4

**mD2**

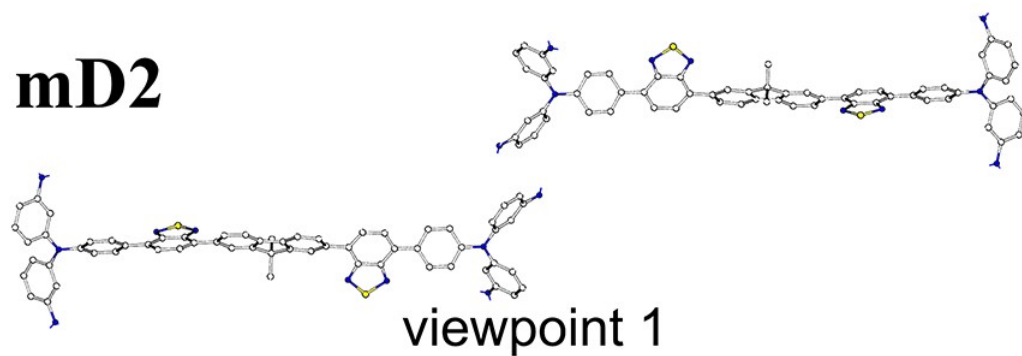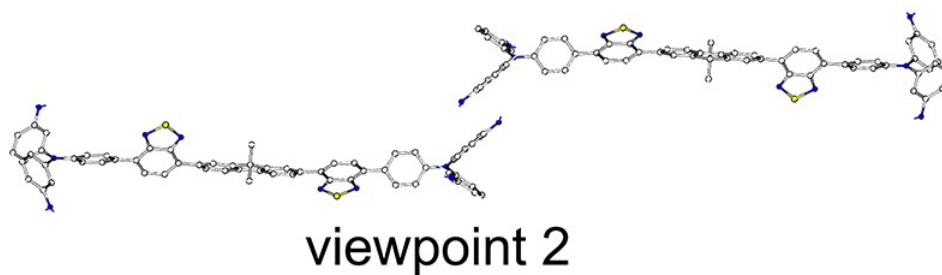

**overlapping orbitals**

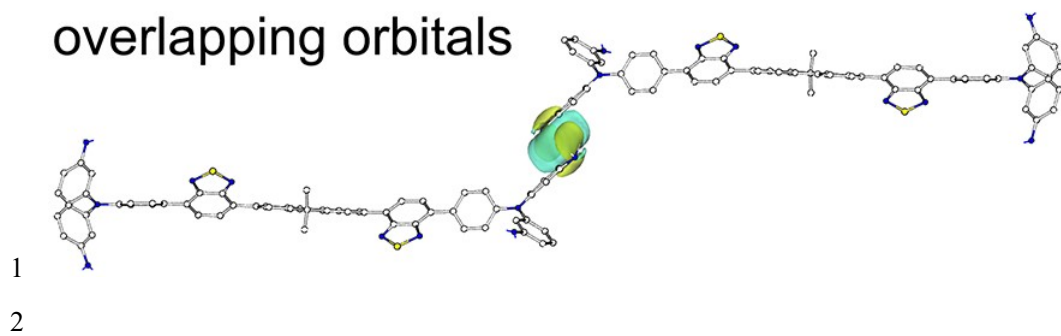

3 **Fig. S12.** (Color online) Viewpoints of interacting molecules in the dimer of the  
4 predominate hopping path and the overlap between the orbitals of mD2.

5

6

**mD3**

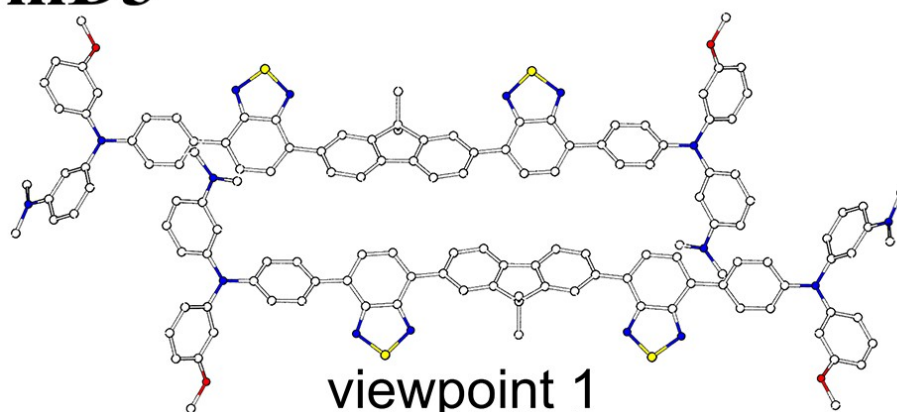

viewpoint 2

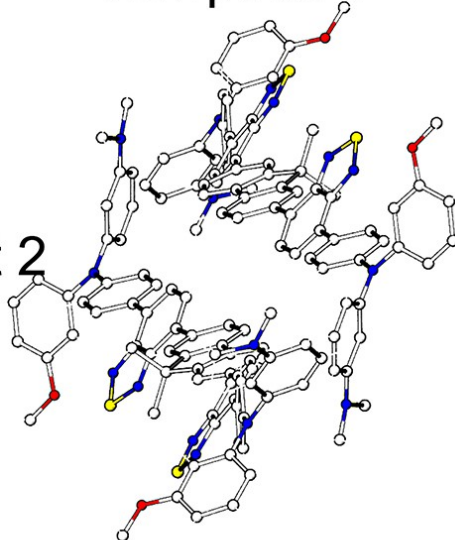

overlapping orbitals

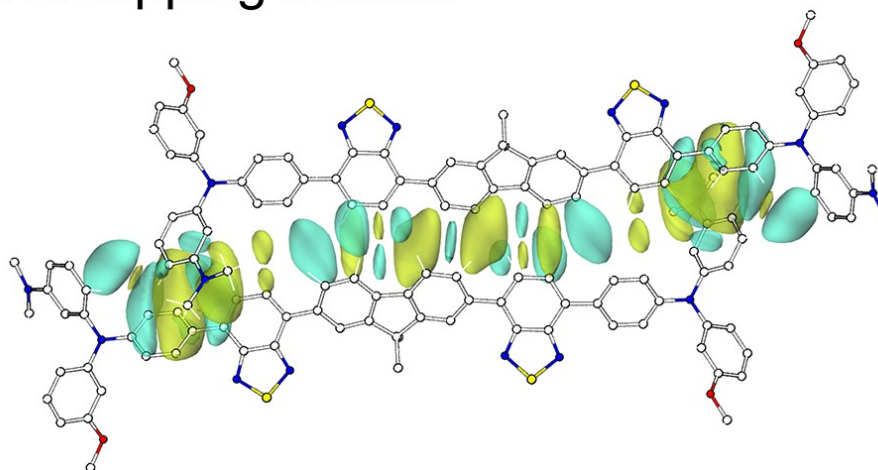

1

2 **Fig. S13.** (Color online) Viewpoints of interacting molecules in the dimer of the  
3 predominate hopping path and the overlap between the orbitals of mD3.

4

**mD4**

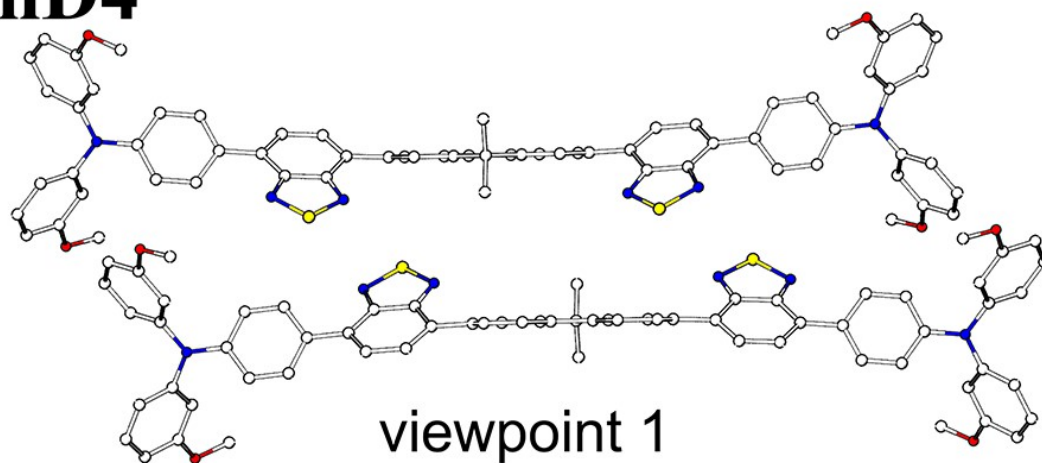

viewpoint 2

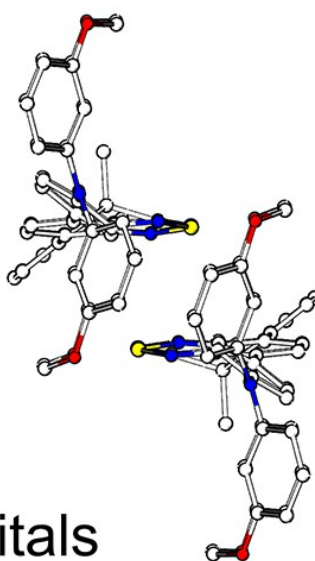

overlapping orbitals

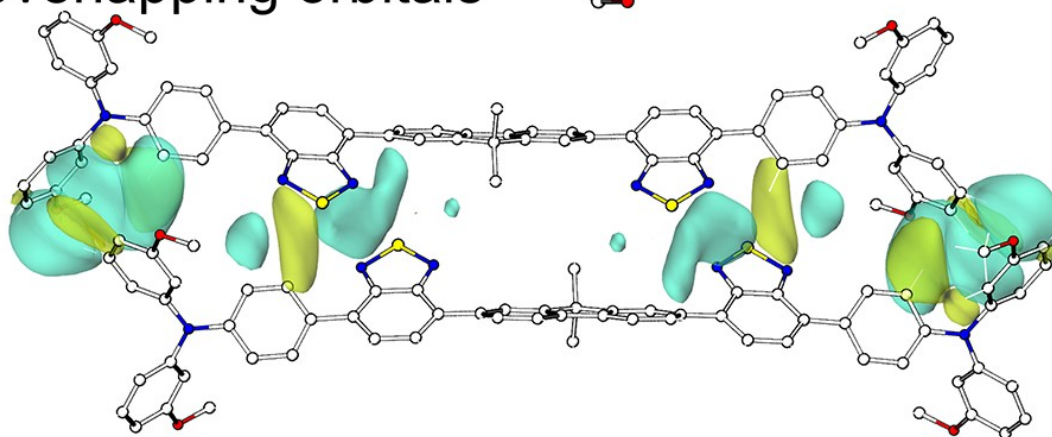

1

2

3 **Fig. S14.** (Color online) Viewpoints of interacting molecules in the dimer of the

4 predominate hopping path and the overlap between the orbitals of mD4.

5



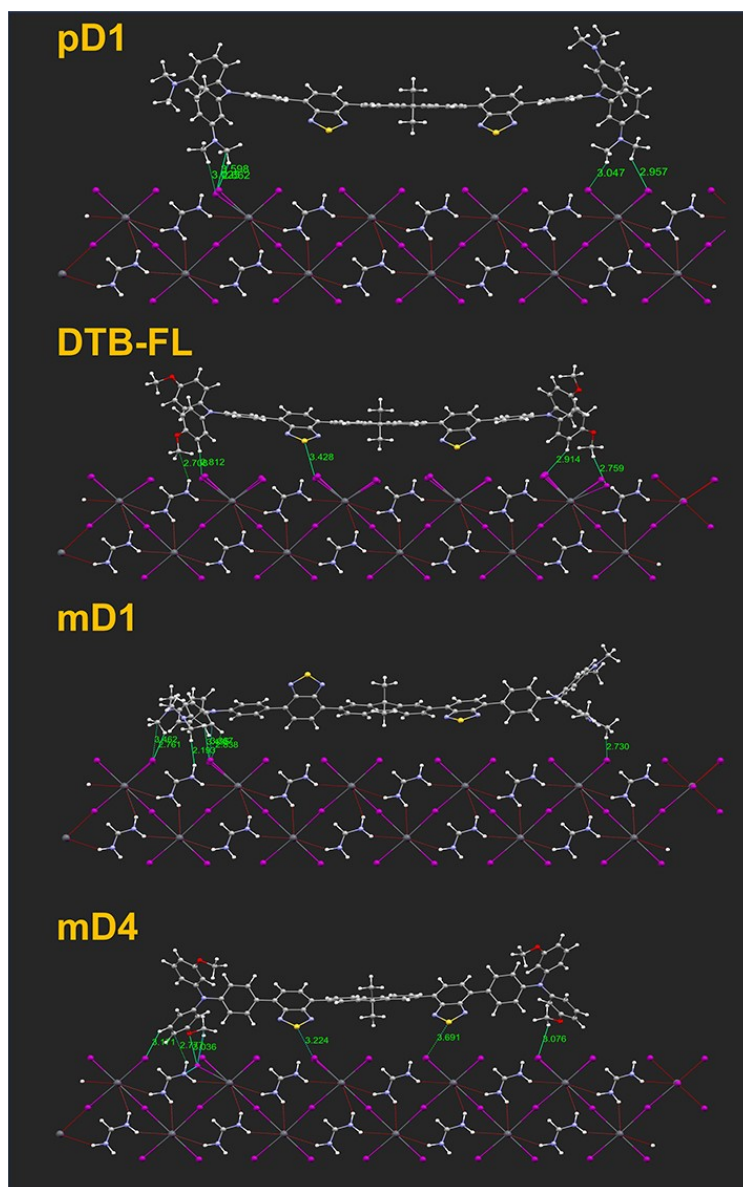

1

2 **Fig. S15.** (Color online) Interfacial interaction between perovskite (110) surface and  
 3 monomer of pD1, DTB-FL, mD1 and mD4, respectively.

4

5

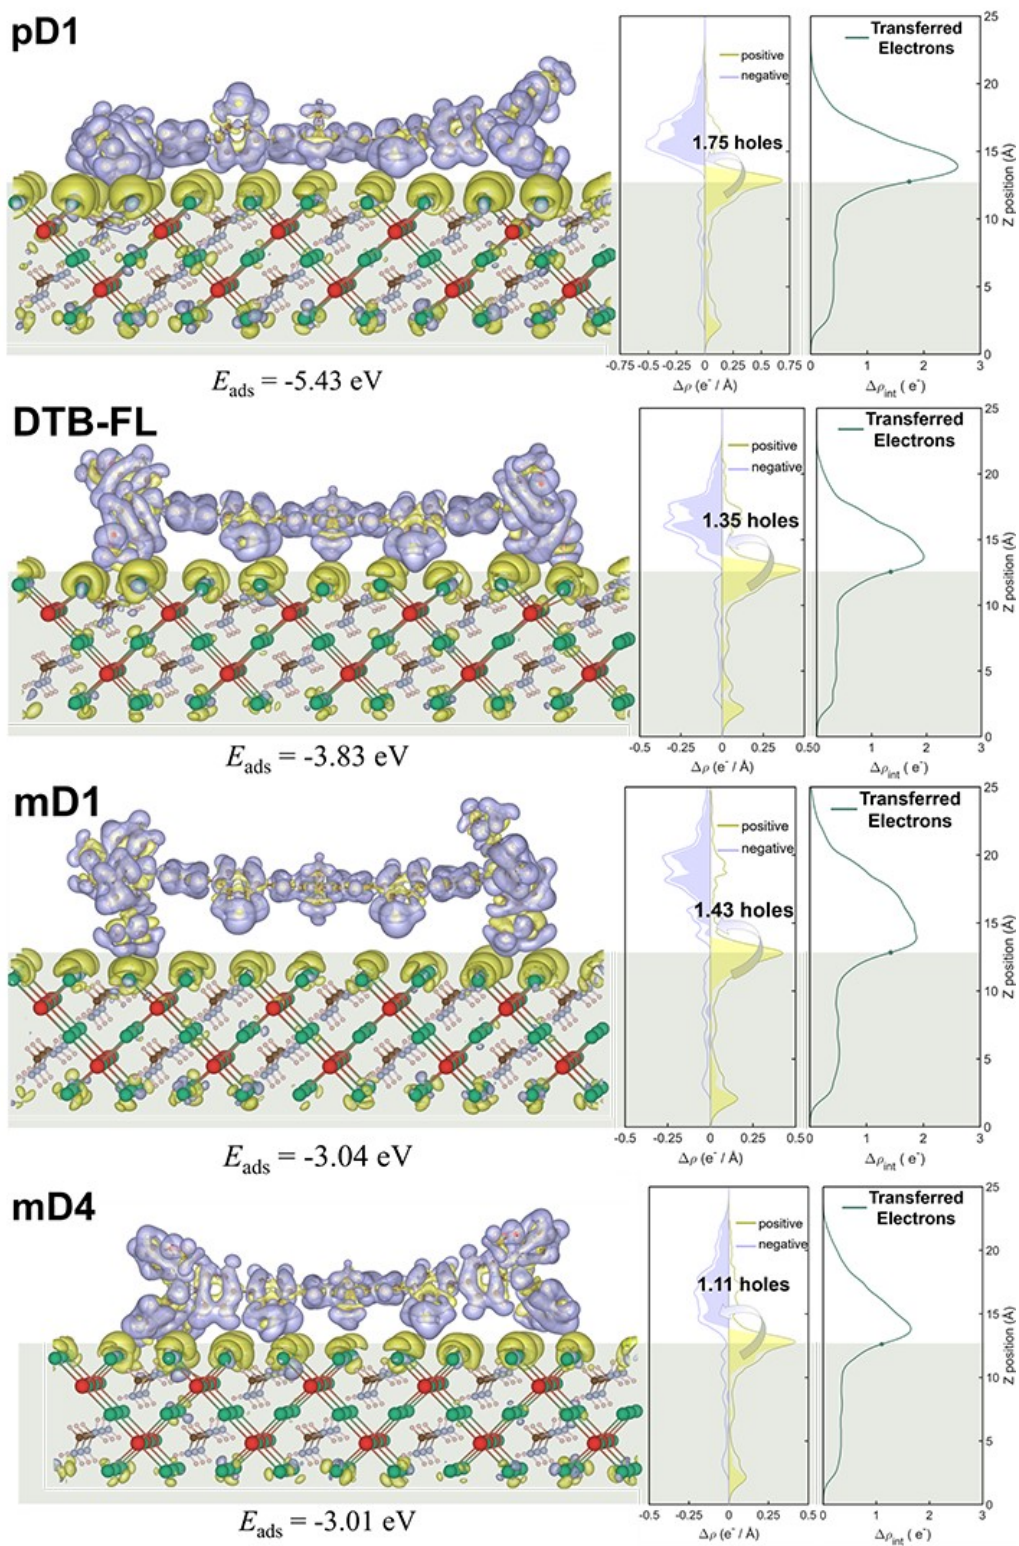

1

2 **Fig. S16.** (Color online) The EDD maps (left), plane-averaged EDD ( $\Delta\rho$ ) of the  
 3 dimer/perovskite systems integrated in the  $x$ - $y$  plane (central) and the transferred  
 4 electrons as function of the  $z$ -axis (right), where light blue and light yellow in EDD

- 1 maps and fillings of  $\Delta\rho$  diagram represent the accumulation and consumption of
- 2 electrons, respectively, and the corresponding color curves in  $\Delta\rho$  diagram represent
- 3 the distribution of positive and negative charge carriers.
- 4

### Buchwald-Hartwig Cross-Coupling Reaction

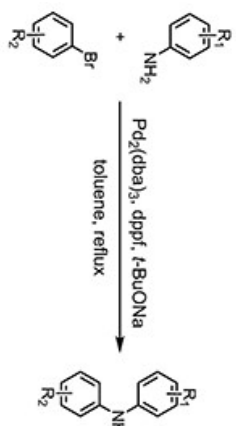

### Miyaura Borylation Reaction

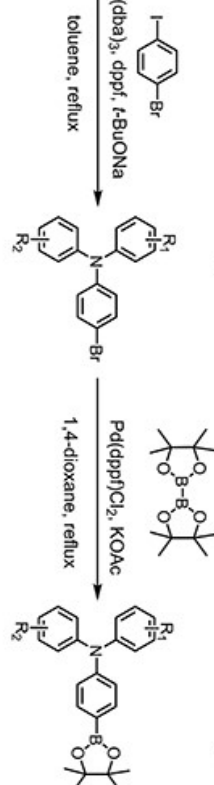

### Suzuki-Miyaura Cross-Coupling Reaction

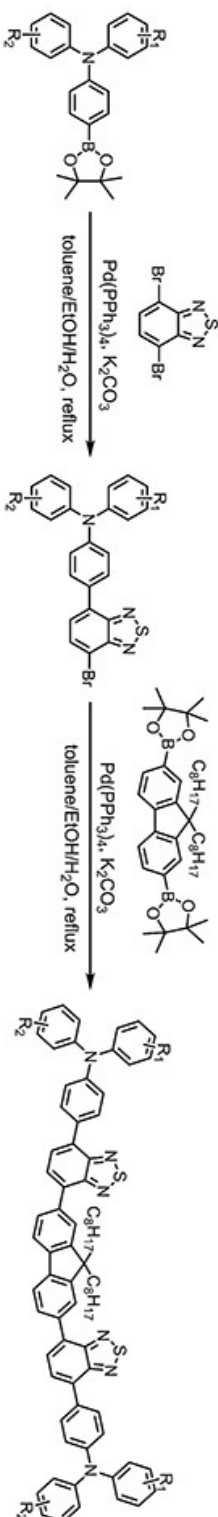

PD1:  $R_1, R_2 = p\text{-NMe}_2$

T-PD2:  $R_1, R_2 = p\text{-NO}_2$

PD3:  $R_1 = p\text{-NMe}_2, R_2 = p\text{-OMe}$

DTB-FL:  $R_1, R_2 = p\text{-OMe}$

MD1:  $R_1, R_2 = m\text{-NMe}_2$

T-MD2:  $R_1, R_2 = m\text{-NO}_2$

MD3:  $R_1 = m\text{-NMe}_2, R_2 = m\text{-OMe}$

MD4:  $R_1, R_2 = m\text{-OMe}$

PD2 & MD2:

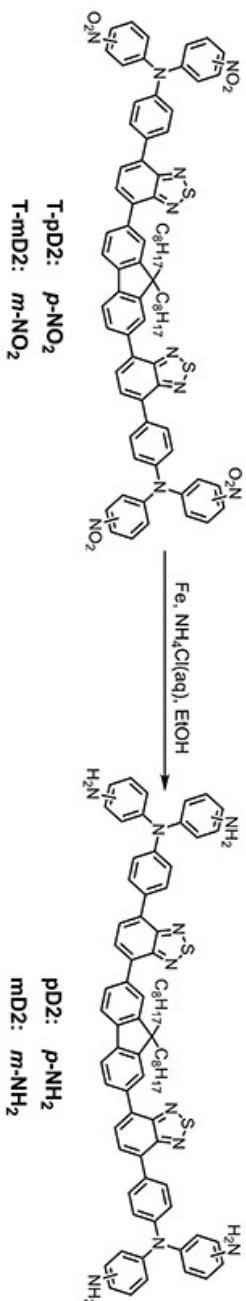

1 Fig. S17. The dia

2 the raw materials

3

4

1 **Table S1.** The ionization potential and electron affinity of the designed donor unit in  
 2 the adiabatic condition, are calculated at the B3LYP/6-31G(d, p) level with the PCM  
 3 model in dichloromethane solvents.

| Donor                         | d1   | d2   | d3   | d4   | d5   | d6   | d7   | d8   |
|-------------------------------|------|------|------|------|------|------|------|------|
| $IP_{\text{donor}}/\text{eV}$ | 4.13 | 4.27 | 4.32 | 4.62 | 4.67 | 4.78 | 4.80 | 4.94 |
| $EA_{\text{donor}}/\text{eV}$ | 0.34 | 0.39 | 0.43 | 0.51 | 0.37 | 0.42 | 0.46 | 0.54 |

4

5

6 **Table S2.** The values of HOMO level and LUMO level calculated at B3LYP/6-31G (d,  
 7 p) level.

| Molecules | $E_{\text{HOMO}}/\text{eV}$ | $E_{\text{LUMO}}/\text{eV}$ |
|-----------|-----------------------------|-----------------------------|
| pD1       | -4.43                       | -2.41                       |
| pD2       | -4.58                       | -2.42                       |
| pD3       | -4.59                       | -2.43                       |
| DTB-FL    | -4.78                       | -2.46                       |
| mD1       | -4.82                       | -2.46                       |
| mD2       | -4.89                       | -2.48                       |
| mD3       | -4.90                       | -2.47                       |
| mD4       | -5.00                       | -2.52                       |

8

9

1 **Table S3.** The fitting values of HOMO and LUMO energy level of investigated  
 2 molecules by employing the empirical equation proposed by W. J. Chi *et al.* (Ref. 117).  
 3

| Molecules | $E^*_{\text{HOMO}}$ (eV)  | $E^*_{\text{LUMO}}$ (eV)  | $E_{\text{Gap}}$ (eV)    |
|-----------|---------------------------|---------------------------|--------------------------|
| pD1       | -5.02                     | -3.00                     | 2.02                     |
| pD2       | -5.19                     | -3.03                     | 2.16                     |
| pD3       | -5.20                     | -3.04                     | 2.16                     |
| DTB-FL    | -5.41(-5.47) <sup>a</sup> | -3.09(-3.23) <sup>a</sup> | 2.32 (2.24) <sup>a</sup> |
| mD1       | -5.45                     | -3.09                     | 2.36                     |
| mD2       | -5.53                     | -3.12                     | 2.42                     |
| mD3       | -5.54                     | -3.11                     | 2.43                     |
| mD4       | -5.65                     | -3.16                     | 2.48                     |

4 <sup>a</sup> Experimental data are obtained from Ref. 53.

5

6 **Table S4.** The calculated and experimental values of HOMO level and LUMO level  
 7 calculated of DT-BT HTM.

|              | $E^*_{\text{HOMO}}$ /eV | $E^*_{\text{LUMO}}$ /eV | $E_{\text{Gap}}$ /eV |
|--------------|-------------------------|-------------------------|----------------------|
| Calculated   | -5.29                   | -2.95                   | 2.34                 |
| Experimental | -5.32                   | -3.19                   | 2.13                 |

8

9

10

1 **Table S5.** The calculated and experimental values of the main absorption peak ( $\lambda_{\text{main}}$ )

2 and the absorption peak in the UV-vis region ( $\lambda_{\text{abs}}$ ) of experimental molecules.

| Molecule                  | DT-BT                               |                                    | DTB-FL                              |                                    |
|---------------------------|-------------------------------------|------------------------------------|-------------------------------------|------------------------------------|
| Absorption type           | $\lambda_{\text{main}} / \text{nm}$ | $\lambda_{\text{abs}} / \text{nm}$ | $\lambda_{\text{main}} / \text{nm}$ | $\lambda_{\text{abs}} / \text{nm}$ |
| Computational             | 317.81                              | 507.09                             | 323.74                              | 499.06                             |
| Experimental <sup>a</sup> | 314                                 | 504                                | 314                                 | 492                                |

3 <sup>a</sup> Experimental data are obtained from Ref. 53.

4

1 **Table S6.** The absorption peak  $\lambda_{\text{abs}}$  and emission peak  $\lambda_{\text{em}}$ , the excitation energy  $E$  and  
 2 corresponding oscillator strength  $f_{\text{abs}}$ , the main configuration of investigated molecules,  
 3 respectively, along with the Stokes shift at the TD-DFT / PBE38 / 6-31G(d, p) level.

| Molecules | $\lambda_{\text{abs}}$ (nm)  | $E$   | $f_{\text{abs}}$ | Main configurations         | $\lambda_{\text{em}}$ (nm)   | Stokes shifts (nm) |
|-----------|------------------------------|-------|------------------|-----------------------------|------------------------------|--------------------|
| pD1       | 542.48                       | 2.286 | 1.185            | H→L 56.9%<br>H-1→L+1 27.9%  | 714.70                       | 172.22             |
| pD2       | 522.49                       | 2.373 | 1.310            | H→L 61.5%<br>H-1→L+1 27.9%  | 664.93                       | 142.44             |
| pD3       | 519.30                       | 2.388 | 1.310            | H→L 60.9%,<br>H-1→L+1 26.8% | 650.78                       | 131.48             |
| DTB-FL    | 499.06<br>(492) <sup>a</sup> | 2.484 | 1.439            | H→L 63.6%<br>H-1→L+1 26.3%  | 611.28<br>(805) <sup>a</sup> | 112.22             |
| mD1       | 489.60                       | 2.532 | 1.463            | H→L 59.7%<br>H-1→L+1 23.0%  | 603.60                       | 114.00             |
| mD2       | 482.56                       | 2.569 | 1.470            | H→L 63.1%<br>H-1→L+1 24.4%  | 597.60                       | 115.04             |
| mD3       | 480.08                       | 2.583 | 1.556            | H→L 61.6%<br>H-1→L+1 21.6%  | 594.73                       | 114.65             |
| mD4       | 471.78                       | 2.628 | 1.478            | H→L 64.6%<br>H-→L+1 22.4%   | 591.87                       | 120.09             |

4 <sup>a</sup> The data in bracket are experimental values obtained from Ref. 53.



1 **Table S7.** Quantitative analysis of ESPs of the investigated molecules at the isosurface

2 = 0.001 au.

| Molecule | Minimal<br>ESP | Maximal<br>ESP | Negative<br>area (%) | Positive<br>area (%) | Negative<br>average<br>ESP | Positive<br>average<br>ESP | Overall<br>average<br>ESP |
|----------|----------------|----------------|----------------------|----------------------|----------------------------|----------------------------|---------------------------|
| pD1      | -40.85         | 22.60          | 59.49                | 40.51                | -12.42                     | 8.73                       | -3.85                     |
| pD2      | -39.74         | 41.15          | 65.46                | 34.54                | -12.04                     | 11.56                      | -3.89                     |
| pD3      | -38.95         | 23.79          | 59.60                | 40.40                | -11.41                     | 8.99                       | -3.17                     |
| DTB-FL   | -36.29         | 21.97          | 57.99                | 42.01                | -10.26                     | 8.72                       | -2.28                     |
| mD1      | -36.85         | 21.71          | 56.83                | 43.17                | -11.13                     | 7.84                       | -2.94                     |
| mD2      | -35.32         | 39.07          | 60.59                | 39.41                | -10.78                     | 10.40                      | -2.43                     |
| mD3      | -38.15         | 22.55          | 58.63                | 41.37                | -11.25                     | 8.47                       | -3.09                     |
| mD4      | -31.93         | 20.57          | 49.89                | 50.11                | -9.24                      | 8.07                       | -0.56                     |

3

4

1 **Table S8.** The crystallographic data of eight HTMs in molecular crystals.

| Molecule | Crystal   | Space | a (Å)  | b (Å)  | c (Å)  | $\alpha$ (°) | $\beta$ (°) | $\gamma$ (°) |
|----------|-----------|-------|--------|--------|--------|--------------|-------------|--------------|
| s        | system    | group |        |        |        |              |             |              |
| pD1      | Triclinic | P-1   | 11.949 | 12.858 | 43.089 | 118.45       | 133.15      | 87.181       |
|          |           |       |        |        |        | 4            | 4           |              |
| pD2      | Triclinic | P-1   | 29.587 | 22.575 | 6.600  | 84.020       | 122.64      | 123.979      |
|          |           |       |        |        |        |              | 7           |              |
| pD3      | Triclinic | P-1   | 22.161 | 20.122 | 11.630 | 53.225       | 65.358      | 64.959       |
| DTB-FL   | Triclinic | P-1   | 14.988 | 18.236 | 20.013 | 65.195       | 50.836      | 50.689       |
| mD1      | Triclinic | P-1   | 12.411 | 15.337 | 22.553 | 81.610       | 65.732      | 78.497       |
| mD2      | Triclinic | P-1   | 8.058  | 37.902 | 15.466 | 106.37       | 124.63      | 109.169      |
|          |           |       |        |        |        | 8            | 8           |              |
| mD3      | Triclinic | P-1   | 32.849 | 12.522 | 10.748 | 70.973       | 54.422      | 87.239       |
| mD4      | Triclinic | P-1   | 25.071 | 13.325 | 13.003 | 92.238       | 129.05      | 92.586       |
|          |           |       |        |        |        |              | 3           |              |

2

3

1 **Table S9.** The reorganization energy  $\lambda_h$  (eV), transfer integral  $V_{ec}$  (eV), distance  
 2 between the centroid to centroid of dimer  $r$  (Å), the hole hopping rate  $k_h$  (s<sup>-1</sup>) and the  
 3 hole mobility  $\mu$  (cm<sup>2</sup> V<sup>-1</sup> s<sup>-1</sup>) of DT-BT molecule.

| HTMs  | Pathway | $\lambda_h$ | $V_{ec}$ | $r$    | $k_h$                 | Contribution | $\mu$                                                            |
|-------|---------|-------------|----------|--------|-----------------------|--------------|------------------------------------------------------------------|
| DT-BT | 1       | 0.158       | -3.395   | 9.924  | $1.05 \times 10^{11}$ | 16.90%       | $8.348 \times 10^{-3}$<br>( $1.92 \times 10^{-5}$ ) <sup>a</sup> |
|       | 2       |             | -3.391   | 9.924  | $1.05 \times 10^{11}$ | 16.82%       |                                                                  |
|       | 3       |             | 2.018    | 11.314 | $3.70 \times 10^{10}$ | 2.74%        |                                                                  |
|       | 4       |             | 2.016    | 11.314 | $3.70 \times 10^{10}$ | 2.73%        |                                                                  |
|       | 5       |             | 2.948    | 17.397 | $7.91 \times 10^{10}$ | 29.52%       |                                                                  |
|       | 6       |             | 2.95     | 17.397 | $7.92 \times 10^{10}$ | 29.60%       |                                                                  |

4 <sup>a</sup> Experimental data are obtained from Ref. 53.

5

6 **Table S10.** The interfacial details of monomer/FAPbI<sub>3</sub> and dimer/FAPbI<sub>3</sub>  
 7 heterojunction, including transferred electrons (abbr. as T. E. ), Variation of transfer  
 8 charge between monomer/FAPbI<sub>3</sub> and dimer/FAPbI<sub>3</sub> ( $\Delta_{T.E.}$ ), and interfacial absorption  
 9 energies ( $E_{ads}$ ).

|        | T. E.<br>(monomer/FAPbI <sub>3</sub> ) | T. E.<br>(dimer / FAPbI <sub>3</sub> ) | $\Delta_{T.E.}$ | $E_{ads}$ (eV)<br>(monomer/FAPbI <sub>3</sub> ) | $E_{ads}$ (eV)<br>(dimer / FAPbI <sub>3</sub> ) |
|--------|----------------------------------------|----------------------------------------|-----------------|-------------------------------------------------|-------------------------------------------------|
| pD1    | 1.75                                   | 2.23                                   | 0.48            | -4.56                                           | -5.43                                           |
| DTB-FL | 1.35                                   | 2.06                                   | 0.71            | -3.48                                           | -3.83                                           |
| mD1    | 1.43                                   | 1.99                                   | 0.56            | -3.34                                           | -3.04                                           |
| mD4    | 1.11                                   | 1.80                                   | 0.70            | -2.82                                           | -3.01                                           |

10

11

12

13
